# Supplementary material
Source: PubMed Central journal article supplement (PMC6547112)
Supplement: jamaotolaryngolheadnecksurg-e190821-s002.pdf [file jamaotolaryngolheadnecksurg-e190821-s002.pdf]

## Supplementary Online Content

The Tinnitus Retraining Therapy Trial Research Group. Effect of tinnitus retraining therapy vs standard of care on tinnitus-related quality of life: a randomized clinical trial. *JAMA Otolaryngol Head Neck Surg*. Published online May 23, 2019.  
doi:10.1001/jamaoto.2019.0821

**eTable 1.** Treatment Assignment by Clinical Center

**eTable 2.** Treatment Adherence by Treatment Group

**eFigure 1.** Hearing Thresholds

**eFigure 2.** Loudness Discomfort Levels

**eFigure 3.** Tinnitus Questionnaire, Tinnitus Functional Index, Tinnitus Handicap Inventory, and 10-Point VAS Scores by Visit and Treatment Group

**eTable 3.** Digital Symbol Substitution Test by Visit and Treatment Group

**eTable 4.** Hearing Handicap Inventory by Visit and Treatment Group

**eTable 5.** State-Trait Inventory by Visit and Treatment Group

**eTable 6.** Positive and Negative Affect Scale by Visit and Treatment Group

**eTable 7.** Beck Depression Inventory by Visit and Treatment Group

**eTable 8.** Comparison of Overall Change in TQ, TFI, and THI Total and Subscale Scores in Partial TRT and TRT Groups With Overall Change in SoC Group Using Full Case Population

This supplementary material has been provided by the authors to give readers additional information about their work.

**eTable 1.** Treatment Assignment by Clinical Center

| Clinic                     | Standard of Care |                | Partial TRT |                | TRT       |                | TOTAL      |                |
|----------------------------|------------------|----------------|-------------|----------------|-----------|----------------|------------|----------------|
|                            | N (%)            |                | N (%)       |                | N (%)     |                | N (%)      |                |
| <b>Patients randomized</b> | <b>49</b>        | <b>(100.0)</b> | <b>51</b>   | <b>(100.0)</b> | <b>51</b> | <b>(100.0)</b> | <b>151</b> | <b>(100.0)</b> |
| BETH                       | 7                | (14.3)         | 8           | (15.7)         | 8         | (15.7)         | 23         | (15.2)         |
| PEND                       | 2                | (4.1)          | 2           | (3.9)          | 3         | (5.9)          | 7          | (4.6)          |
| PORT                       | 11               | (22.4)         | 11          | (21.6)         | 11        | (21.6)         | 33         | (21.9)         |
| SAND                       | 7                | (14.3)         | 7           | (13.7)         | 8         | (15.7)         | 22         | (14.6)         |
| TRAV                       | 9                | (18.4)         | 10          | (19.6)         | 9         | (17.6)         | 28         | (18.5)         |
| WILF                       | 13               | (26.5)         | 13          | (25.5)         | 12        | (23.5)         | 38         | (25.2)         |

BETH: Walter Reed National Military Medical Center

PEND: Naval Hospital Camp Pendleton

PORT: Naval Medical Center Portsmouth

SAND: Naval Medical Center San Diego

TRAV: David Grant Medical Center, Travis Air Force Base

WILF: Wilford Hall Ambulatory Surgical Center

**eTable 2.** Treatment Adherence by Treatment Group

| Characteristic                                                                                   | SoC       | Partial TRT | TRT       |
|--------------------------------------------------------------------------------------------------|-----------|-------------|-----------|
| N                                                                                                | 46        | 51          | 49        |
|                                                                                                  | N (%)     | N (%)       | N (%)     |
| Counseling session < 1 hour                                                                      | 6 (13.0)  | 5 (9.8)     | 7 (14.3)  |
| Counseling session ≥ 1 hour but < 2 hours                                                        | 38 (82.6) | 42 (82.4)   | 33 (67.3) |
| Counseling session ≥2 hours                                                                      | 2 (4.3)   | 4 (7.8)     | 9 (18.4)  |
| N                                                                                                | 42        | 45          | 43        |
| Use environmental sound device on regular basis or sound generator usually worn on regular basis | 37 (88.1) | 37 (82.2)   | 35 (81.4) |
| Use enriched background sound at night                                                           | 33 (78.6) | 24 (53.3)   | 27 (62.8) |
| Use enriched background sound during day                                                         | 23 (54.8) | 15 (33.3)   | 24 (55.8) |

**eFigure 1. Hearing Thresholds**

**A, Hearing thresholds at baseline by ear and treatment group**

Box plots showing median, 10<sup>th</sup>, 25<sup>th</sup>, 75<sup>th</sup>, and 90<sup>th</sup> percentiles. Box boundaries show 25<sup>th</sup> and 75<sup>th</sup> percentiles and whiskers show 10<sup>th</sup> and 90<sup>th</sup> percentiles. Outliers shown as circles above and below box.

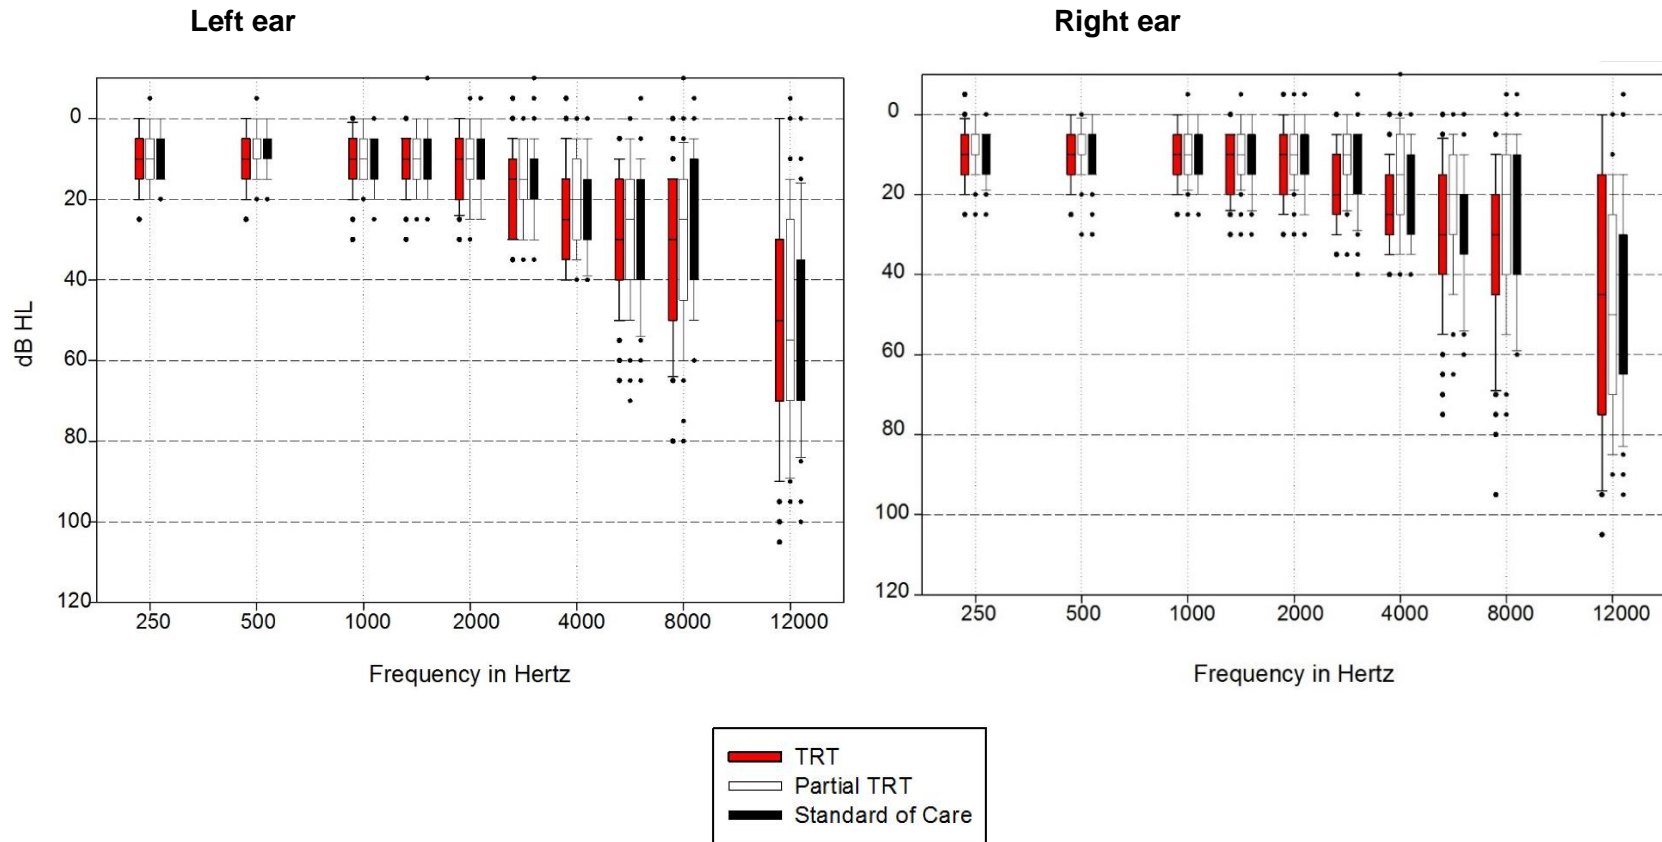

### B, Hearing thresholds at 18 months' follow-up by ear and treatment group

Box plots showing median, 10<sup>th</sup>, 25<sup>th</sup>, 75<sup>th</sup>, and 90<sup>th</sup> percentiles. Box boundaries show 25<sup>th</sup> and 75<sup>th</sup> percentiles and whiskers show 10<sup>th</sup> and 90<sup>th</sup> percentiles. Outliers shown as circles above and below box.

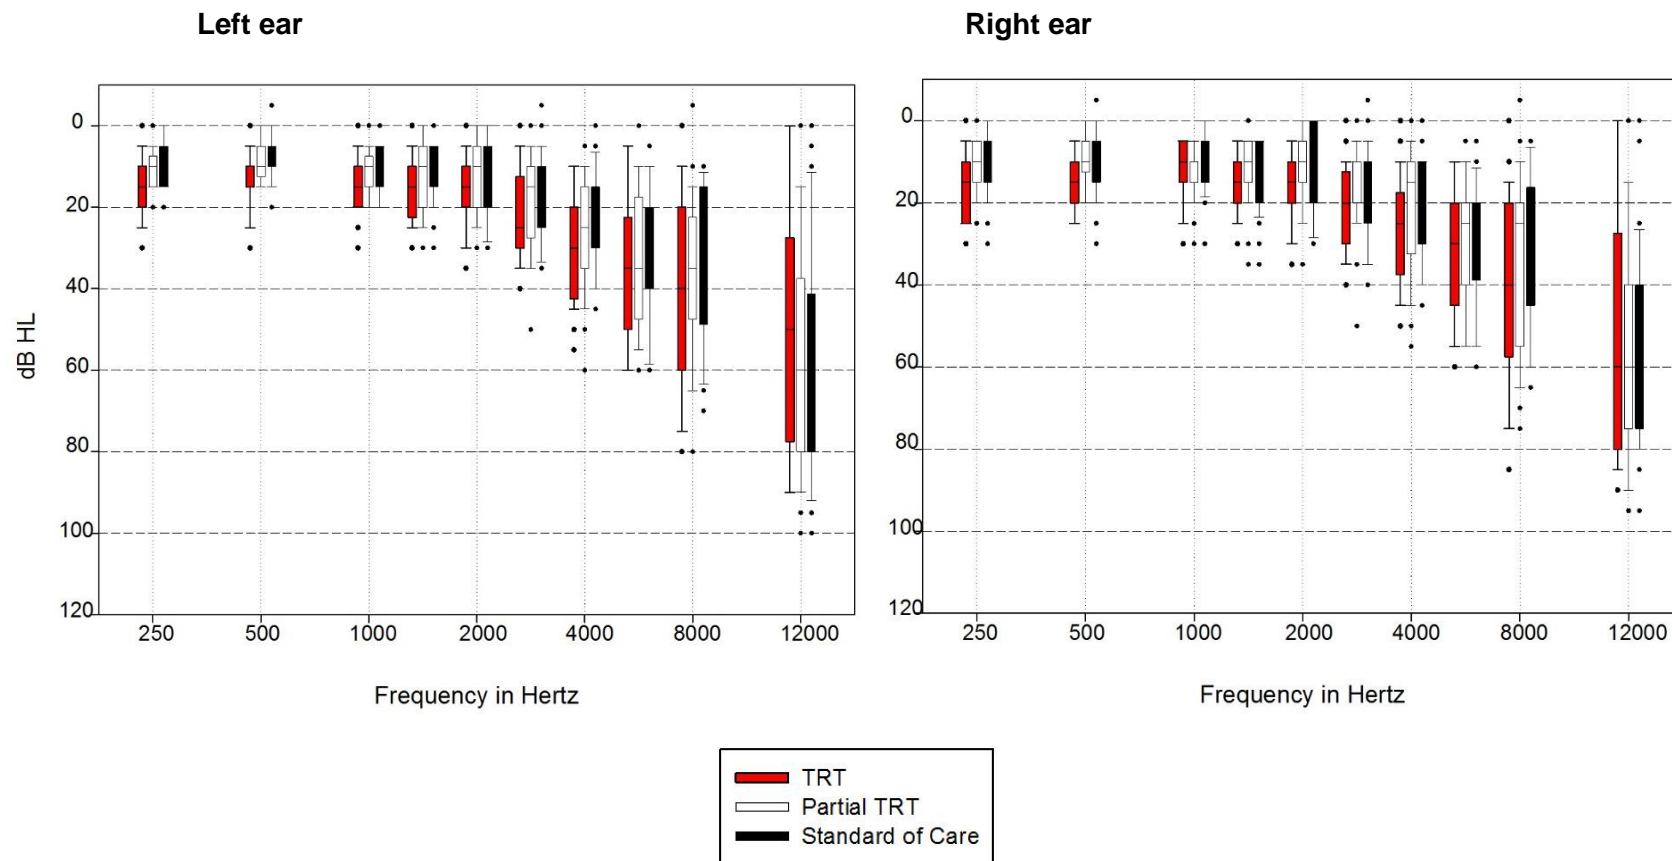

**eFigure 2.** Loudness Discomfort Levels

**A, Loudness discomfort levels at baseline by ear and treatment group**

Box plots showing median, 10<sup>th</sup>, 25<sup>th</sup>, 75<sup>th</sup>, and 90<sup>th</sup> percentiles. Box boundaries show 25<sup>th</sup> and 75<sup>th</sup> percentiles and whiskers show 10<sup>th</sup> and 90<sup>th</sup> percentiles. Outliers shown as circles above and below box.

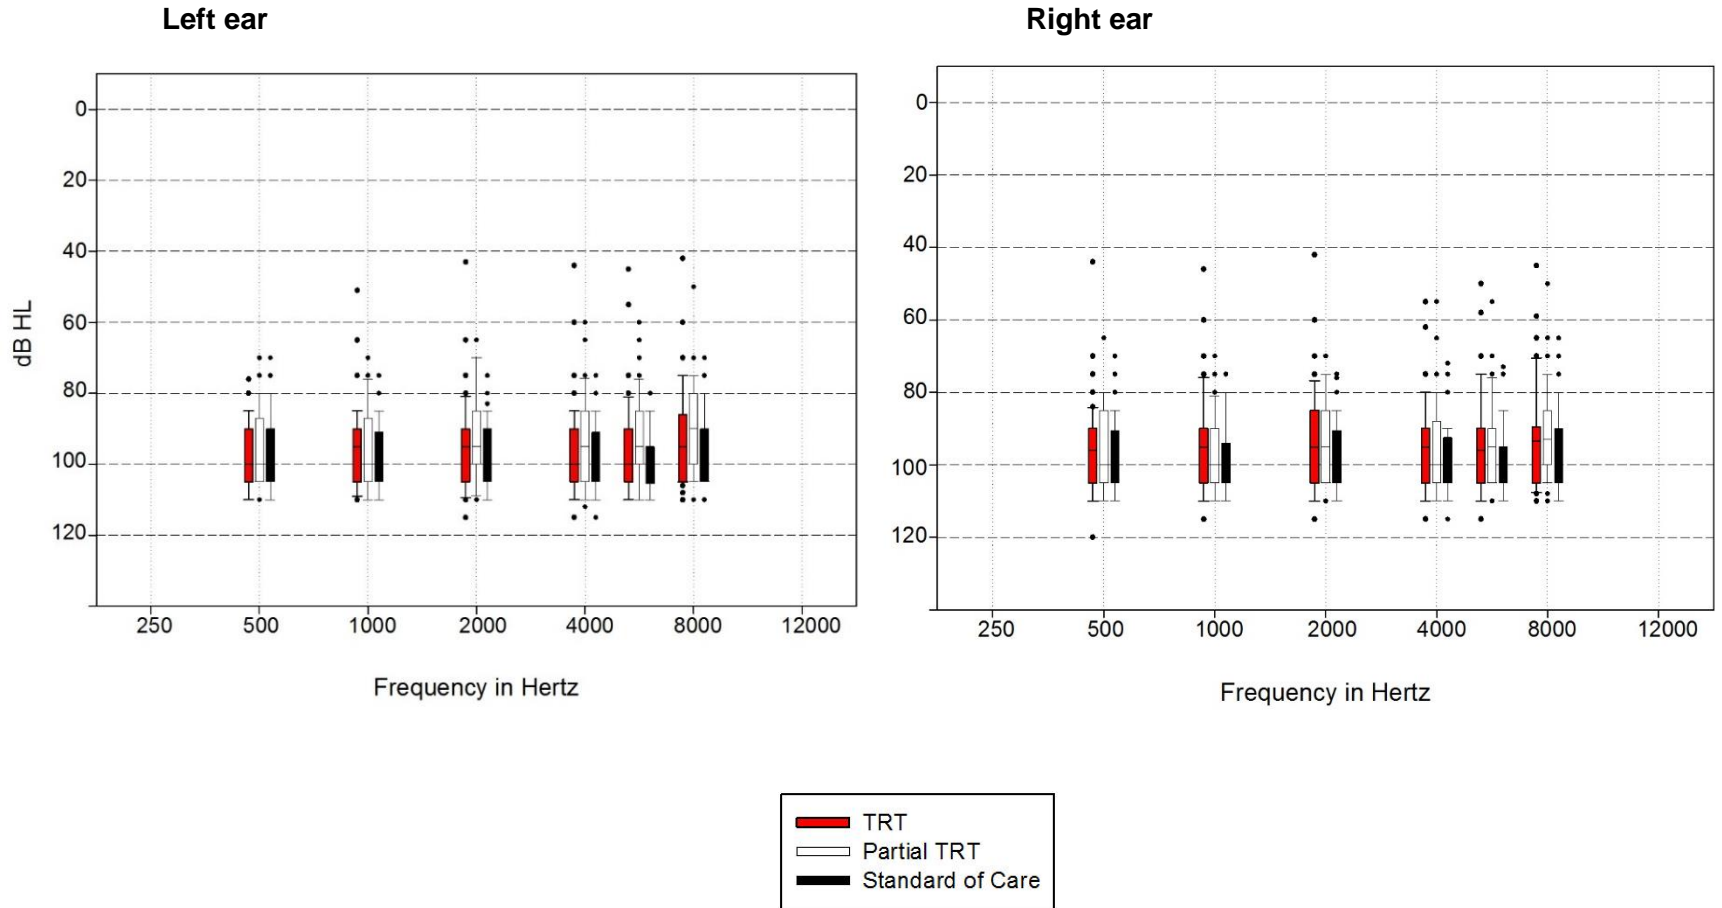

### B, Loudness discomfort levels at 18 months' follow-up by ear and treatment group

Box plots showing median, 10<sup>th</sup>, 25<sup>th</sup>, 75<sup>th</sup>, and 90<sup>th</sup> percentiles. Box boundaries show 25<sup>th</sup> and 75<sup>th</sup> percentiles and whiskers show 10<sup>th</sup> and 90<sup>th</sup> percentiles. Outliers shown as circles above and below box.

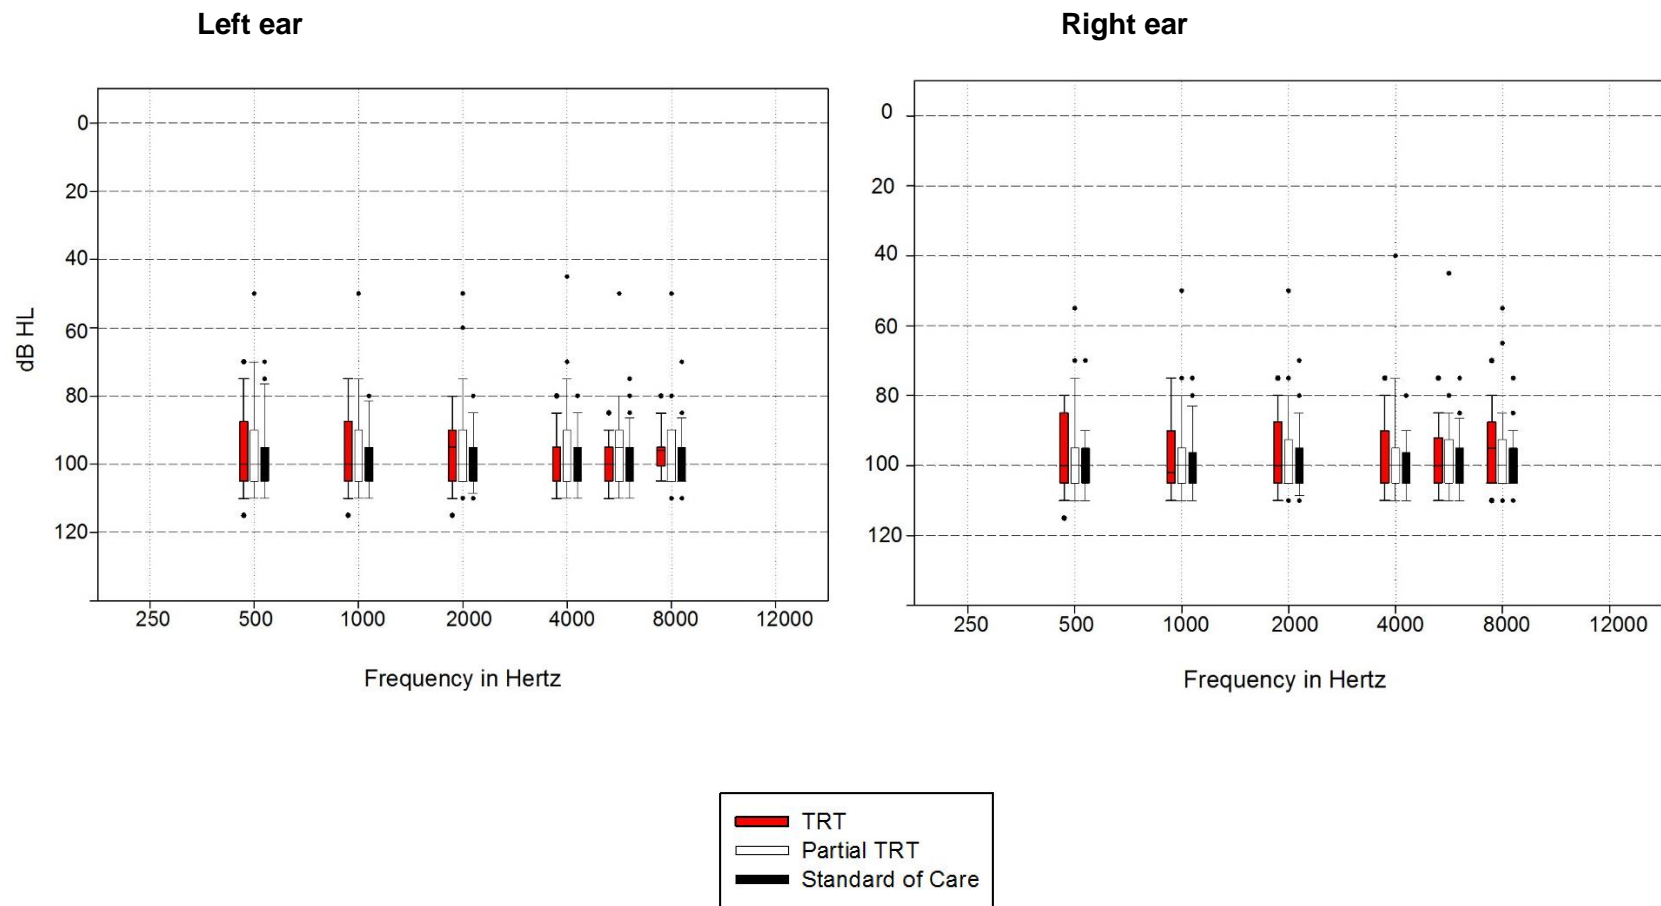

**eFigure 3.** Tinnitus Questionnaire, Tinnitus Functional Index, Tinnitus Handicap Inventory, and 10-Point VAS Scores by Visit and Treatment Group

Data points shown are means  $\pm$  SE of values at baseline and follow-up.

**A. Tinnitus Questionnaire.**

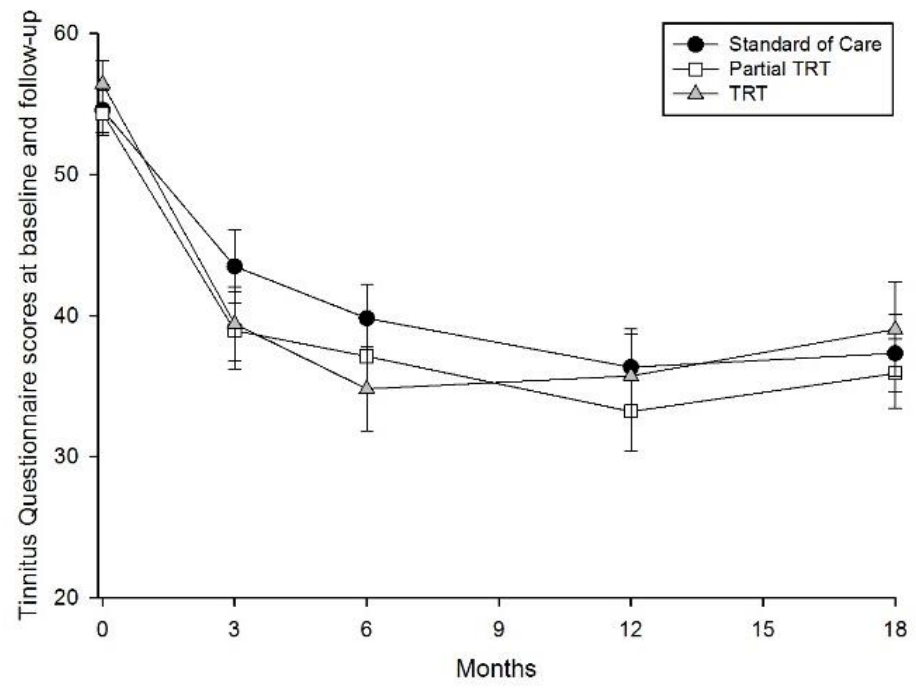

**B. Tinnitus Functional Index**

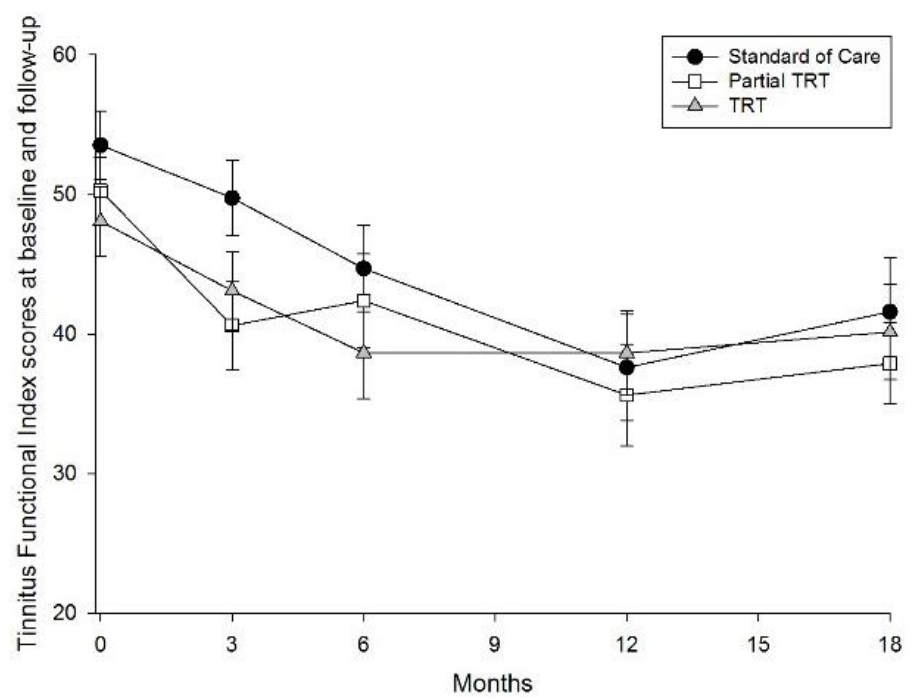



### C. Tinnitus Handicap Inventory

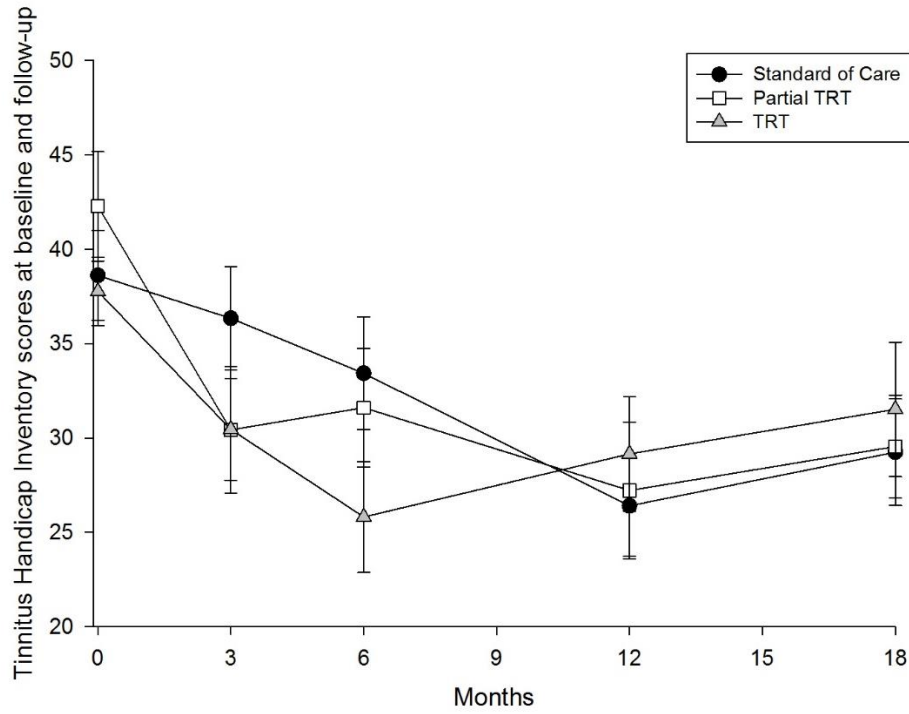

### D. 10-Point VAS on Tinnitus Problem

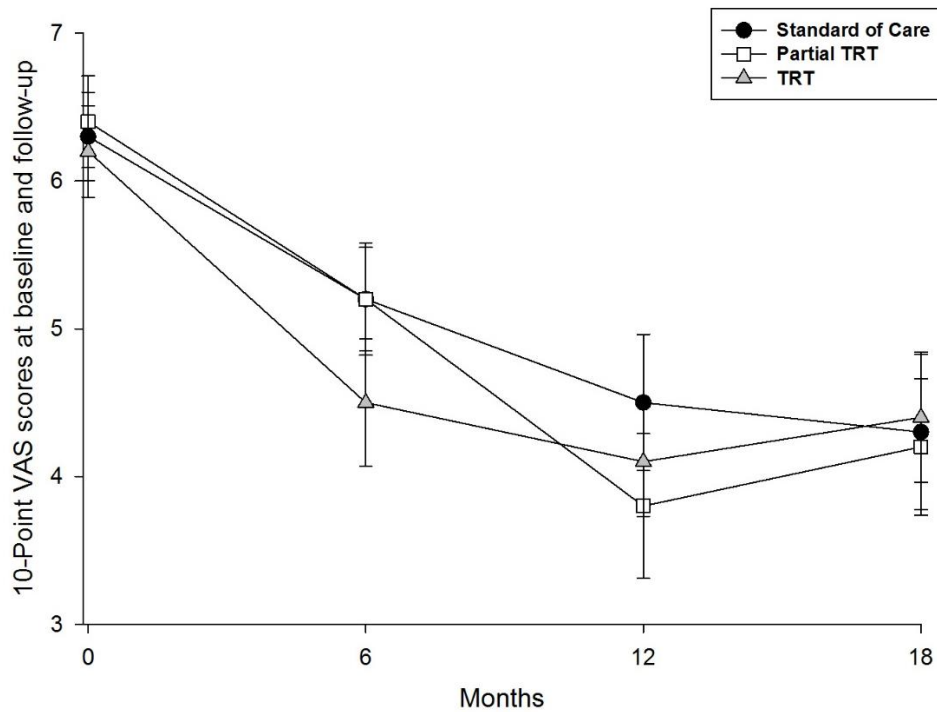

**eTable 3.** Digital Symbol Substitution Test by Visit and Treatment Group

| <b>Visit</b>             | <b>Baseline</b>  | <b>6 month</b>   | <b>18 month</b>  |
|--------------------------|------------------|------------------|------------------|
| <b>SoC (n)</b>           | <b>49</b>        | <b>39</b>        | <b>32</b>        |
| <b>Partial TRT (n)</b>   | <b>51</b>        | <b>35</b>        | <b>30</b>        |
| <b>TRT (n)</b>           | <b>51</b>        | <b>31</b>        | <b>29</b>        |
|                          |                  |                  |                  |
| <b>Standard of Care:</b> | <b>Mean (SD)</b> | <b>Mean (SD)</b> | <b>Mean (SD)</b> |
| No. items attempted      | 55.3 (16.8)      | 59.8 (23.2)      | 62.4 (18.4)      |
| Percent items completed  | 98.8 (7.2)       | 93.2 (16.8)      | 95.1 (15.0)      |
|                          |                  |                  |                  |
| <b>Partial TRT:</b>      |                  |                  |                  |
| No. items attempted      | 55.9 (18.7)      | 62.4 (18.4)      | 61.2 (20.1)      |
| Percent items completed  | 97.5 (10.1)      | 95.1 (14.5)      | 93.0 (17.6)      |
|                          |                  |                  |                  |
| <b>TRT:</b>              |                  |                  |                  |
| No. items attempted      | 59.0 (16.6)      | 56.6 (12.8)      | 62.7 (28.5)      |
| Percent items completed  | 97.7 (10.1)      | 98.0 (9.0)       | 94.4 (15.4)      |
|                          |                  |                  |                  |
|                          |                  |                  |                  |

**eTable 4.** Hearing Handicap Inventory by Visit and Treatment Group

| <b>Visit</b>                              | <b>Baseline</b>  | <b>6 month</b>   | <b>18 month</b>  |
|-------------------------------------------|------------------|------------------|------------------|
| <b>SoC (n)</b>                            | <b>49</b>        | <b>39</b>        | <b>33</b>        |
| <b>Partial TRT (n)</b>                    | <b>51</b>        | <b>36</b>        | <b>32</b>        |
| <b>TRT (n)</b>                            | <b>51</b>        | <b>31</b>        | <b>29</b>        |
|                                           |                  |                  |                  |
| <b>Total score (scale 0 to 40)</b>        | <b>Mean (SD)</b> | <b>Mean (SD)</b> | <b>Mean (SD)</b> |
| SoC                                       | 13.3 (10.0)      | 11.1 (9.6)       | 12.8 (10.9)      |
| Partial TRT                               | 14.5 (9.5)       | 13.2 (9.5)       | 10.1 (8.2)       |
| TRT                                       | 12.6 (9.5)       | 11.3 (8.2)       | 13.7 (10.7)      |
|                                           |                  |                  |                  |
| <b>Emotional subscale (scale 0 to 20)</b> |                  |                  |                  |
| SoC                                       | 5.6 (5.0)        | 4.9 (4.7)        | 5.2 (5.3)        |
| Partial TRT                               | 5.8 (4.5)        | 5.5 (4.6)        | 3.7 (3.9)        |
| TRT                                       | 5.4 (5.0)        | 4.6 (4.0)        | 5.7 (5.5)        |
|                                           |                  |                  |                  |
| <b>Social subscale (scale 0 to 20)</b>    |                  |                  |                  |
| SoC                                       | 7.6 (5.6)        | 6.2 (5.6)        | 7.6 (6.2)        |
| Partial TRT                               | 8.7 (5.7)        | 7.7 (5.6)        | 6.4 (5.0)        |
| TRT                                       | 7.2 (5.4)        | 6.6 (5.1)        | 7.9 (6.2)        |
|                                           |                  |                  |                  |

**eTable 5.** State-Trait Inventory by Visit and Treatment Group

| <b>Visit</b>                          | <b>Baseline</b>  | <b>6 month</b>   | <b>18 month</b>  |
|---------------------------------------|------------------|------------------|------------------|
| <b>SoC (n)</b>                        | <b>49</b>        | <b>39</b>        | <b>33</b>        |
| <b>Partial TRT (n)</b>                | <b>51</b>        | <b>35</b>        | <b>33</b>        |
| <b>TRT (n)</b>                        | <b>51</b>        | <b>32</b>        | <b>29</b>        |
|                                       |                  |                  |                  |
| <b>State subscale (scale 0 to 80)</b> | <b>Mean (SD)</b> | <b>Mean (SD)</b> | <b>Mean (SD)</b> |
| SoC                                   | 32.2 (10.4)      | 34.9 (11.4)      | 33.6 (9.8)       |
| Partial TRT                           | 33.6 (12.1)      | 32.9 (12.3)      | 31.2 (11.1)      |
| TRT                                   | 30.7 (9.3)       | 28.5 (9.9)       | 30.1 (8.7)       |
|                                       |                  |                  |                  |
| <b>Trait subscale (scale 0 to 80)</b> |                  |                  |                  |
| SoC                                   | 33.5 (8.9)       | --               | --               |
| Partial TRT                           | 35.0 (10.3)      | --               | --               |
| TRT                                   | 31.6 (8.9)       | --               | --               |
|                                       |                  |                  |                  |

**eTable 6.** Positive and Negative Affect Scale by Visit and Treatment Group

| <b>Visit</b>                             | <b>Baseline</b>  | <b>6 month</b>   | <b>18 month</b>  |
|------------------------------------------|------------------|------------------|------------------|
| <b>SoC (n)</b>                           | <b>49</b>        | <b>39</b>        | <b>33</b>        |
| <b>Partial TRT (n)</b>                   | <b>51</b>        | <b>35</b>        | <b>33</b>        |
| <b>TRT (n)</b>                           | <b>51</b>        | <b>32</b>        | <b>29</b>        |
|                                          |                  |                  |                  |
| <b>Positive subscale (scale 0 to 80)</b> | <b>Mean (SD)</b> | <b>Mean (SD)</b> | <b>Mean (SD)</b> |
| SoC                                      | 38.9 (5.0)       | 36.9 (7.1)       | 38.5 (4.7)       |
| Partial TRT                              | 36.3 (7.4)       | 38.2 (7.9)       | 38.4 (5.7)       |
| TRT                                      | 36.9 (7.5)       | 36.6 (10.0)      | 38.0 (6.4)       |
|                                          |                  |                  |                  |
| <b>Negative subscale (scale 0 to 80)</b> |                  |                  |                  |
| SoC                                      | 16.0 (5.6)       | 17.2 (8.2)       | 16.0 (6.8)       |
| Partial TRT                              | 15.1 (5.2)       | 13.8 (4.6)       | 13.6 (2.1)       |
| TRT                                      | 16.3 (6.0)       | 15.6 (7.5)       | 16.1 (7.5)       |
|                                          |                  |                  |                  |

**eTable 7.** Beck Depression Inventory by Visit and Treatment Group

| Visit                                          | Baseline  | 3 month   | 6 month   | 12 month  | 18 month  |
|------------------------------------------------|-----------|-----------|-----------|-----------|-----------|
| <b>SoC (n)</b>                                 | <b>49</b> | <b>41</b> | <b>38</b> | <b>28</b> | <b>33</b> |
| <b>Partial TRT (n)</b>                         | <b>51</b> | <b>38</b> | <b>35</b> | <b>27</b> | <b>32</b> |
| <b>TRT (n)</b>                                 | <b>51</b> | <b>40</b> | <b>31</b> | <b>32</b> | <b>29</b> |
| <b>Total Score (scale 0 to 7)</b>              |           |           |           |           |           |
| <b>Standard of Care:</b>                       |           |           |           |           |           |
| Median                                         | 1         | 1         | 1         | 0         | 1         |
| 1rst, 3 <sup>rd</sup> quartiles                | 0, 3      | 0, 3      | 0, 3      | 0, 1      | 0, 2      |
| Mean (S.D.)                                    | 1.8 (2.3) | 1.5 (1.7) | 2.1 (2.4) | 1.1 (1.8) | 1.5 (1.7) |
| <b>Partial TRT:</b>                            |           |           |           |           |           |
| Median                                         | 1         | 0.5       | 0         | 0         | 0         |
| 1rst, 3 <sup>rd</sup> quartiles                | 0, 3      | 0, 3      | 0, 4      | 0, 1      | 0, 1.5    |
| Mean (S.D.)                                    | 2.0 (2.7) | 1.9 (2.9) | 2.0 (3.1) | 1.5 (3.3) | 1.5 (2.8) |
| <b>TRT:</b>                                    |           |           |           |           |           |
| Median                                         | 1         | 0.5       | 0         | 0         | 1         |
| 1rst, 3 <sup>rd</sup> quartiles                | 0, 3      | 0, 2      | 0, 2      | 0, 1.5    | 0, 2      |
| Mean (S.D.)                                    | 1.5 (2.1) | 1.3 (1.9) | 1.2 (1.9) | 1.2 (2.7) | 1.3 (1.6) |
| <b>Global score <math>\geq</math> 4, n (%)</b> |           |           |           |           |           |
| <b>Standard of Care:</b>                       | 10 (20.4) | 4 (9.8)   | 9 (23.7)  | 3 (10.7)  | 5 (15.2)  |
| <b>Partial TRT</b>                             | 9 (17.6)  | 7 (18.4)  | 10 (28.6) | 4 (14.8)  | 5 (15.6)  |
| <b>TRT</b>                                     | 7 (13.7)  | 5 (12.5)  | 4 (12.9)  | 3 (9.4)   | 2 (6.9)   |
|                                                |           |           |           |           |           |
|                                                |           |           |           |           |           |

**eTable 8.** Comparison of Overall Change in TQ, TFI, and THI Total and Subscale Scores in Partial TRT and TRT Groups With Overall Change in SoC Group Using Full Case Population

|                                       | <b>Partial TRT</b>       | <b>TRT</b>               |
|---------------------------------------|--------------------------|--------------------------|
| <b>A. Tinnitus Questionnaire</b>      | <b>Estimate (95% CI)</b> | <b>Estimate (95% CI)</b> |
| Total score                           | 1.31 (-5.26 to 7.88)     | -2.50 (-9.03 to 4.02)    |
| Emotional distress                    | 0.87 (-1.69 to 3.42)     | -0.05 (-2.78 to 2.69)    |
| Intrusiveness                         | 0.74 (-0.53 to 2.00)     | -0.08 (-1.28 to 1.11)    |
| Auditory perceptual difficulties      | 0.62 (-0.57 to 1.81)     | -0.50 (-1.52 to 0.53)    |
| Sleep disturbance                     | -0.59 (-1.40 to 0.23)    | -0.51 (-1.33 to 0.31)    |
| Somatic complaint                     | -0.29 (-0.54 to 1.13)    | -0.06 (-0.81 to 0.68)    |
|                                       |                          |                          |
| <b>B. Tinnitus Functional Index</b>   |                          |                          |
| Total score                           | 2.26 (-5.26 to 9.79)     | 2.42 (-4.41 to 9.26)     |
| Emotional distress                    | -3.19 (-12.91 to 6.52)   | -4.83 (-12.79 to 3.13)   |
| Intrusiveness                         | 1.35 (-7.45 to 10.15)    | -2.56 (-11.43 to 6.32)   |
| Reduced sense of control              | 5.30 (-4.06 to 14.66)    | 4.60 (-5.10 to 14.30)    |
| Cognitive interference                | -2.31 (-12.35 to 7.74)   | -2.75 (-10.85 to 5.34)   |
| Sleep disturbance                     | -13.28 (-25.56 to -1.01) | -9.76 (-25.40 to 5.89)   |
| Auditory difficulties                 | 2.68 (-8.57 to 13.93)    | 2.54 (-8.65 to 13.72)    |
| Relaxation interference               | -6.32 (-17.39 to 4.75)   | -4.31 (-14.34 to 5.73)   |
| Reduced quality of life               | -2.31 (-10.56 to 5.94)   | -2.21 (-9.90 to 5.47)    |
|                                       |                          |                          |
| <b>C. Tinnitus Handicap Inventory</b> |                          |                          |
| Total score                           | -2.10 (-8.72 to 4.51)    | -1.52 (-7.92 to 4.87)    |
| Functional                            | -3.12 (-6.81 to -0.56)   | -2.70 (-5.73 to 0.35)    |
| Emotional                             | 0.92 (-1.53 to 3.37)     | 0.37 (-2.06 to 2.80)     |
| Catastrophic                          | 0.10 (-1.44 to 1.64)     | 0.81(-0.86 to 2.47)      |

<sup>a</sup> p = 0.0339

Models included only participants who completed all study visits (full case analysis). Models were run using repeated measures Generalized Estimating Equations, exchangeable covariance structure and adjusted for visit, clinical center, age group, gender, baseline State Trait Anxiety Inventory, and baseline Positive and Negative Affect Schedule.
