# Supplementary material
Source: PubMed Central journal article supplement (PMC6547112)
Supplement: jamaotolaryngolheadnecksurg-e190821-s003.pdf [file jamaotolaryngolheadnecksurg-e190821-s003.pdf]

## Data Sharing Statement

Scherer. Effect of Tinnitus Retraining Therapy vs Standard of Care on Tinnitus-Related Quality of Life. *JAMA Otolaryngol Head Neck Surg*. Published May 23, 2019. 10.1001/jamaoto.2019.0821

### Data

**Data available:** Yes

**Data types:** Deidentified participant data

**How to access data:** Available upon request to [rschere1@jhu.edu](mailto:rschere1@jhu.edu)

**When available:** With publication

### Supporting Documents

**Document types:** None

### Additional Information

**Who can access the data:** researchers whose proposed use of the data has been approved

**Types of analyses:** analyses with an approved specific aim proposed upon request

**Mechanisms of data availability:** after approval of a proposal and with a signed data access agreement

**Any additional restrictions:** review and/or approval by an institutional review board
